# Supplementary material
Source: publisher site journal article supplement (https://www.dovepress.com/article/532397)
Supplement: Supplementary file 1 [file Supplementary%20Material.docx]

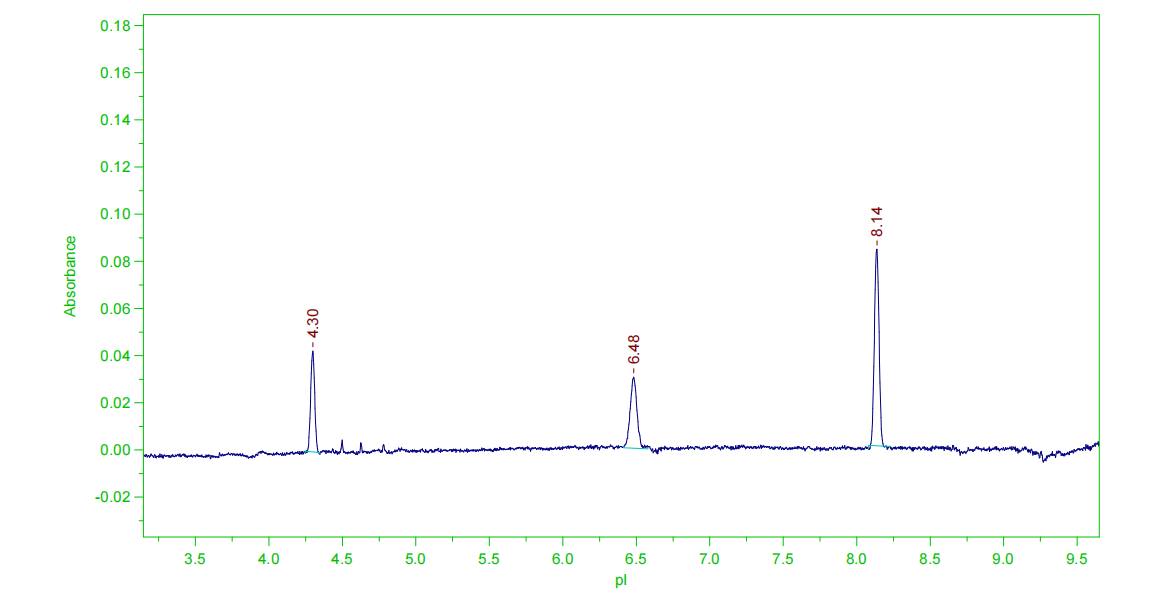


Figure S1 The pI diagram of Marker1, Marker2, and Marker3.


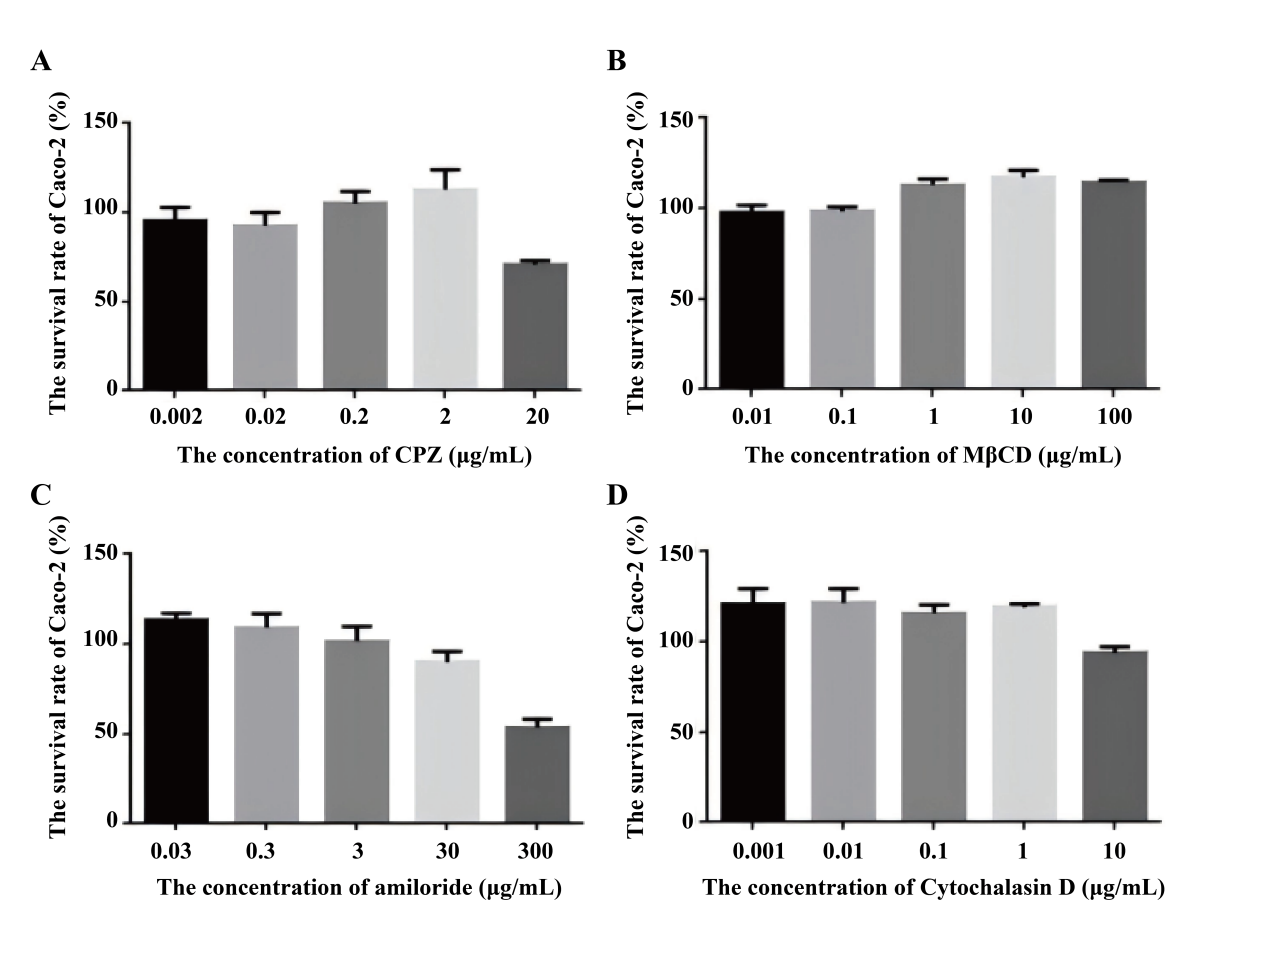


Figure S2 The cytotoxicity result of the CPZ (A), MβCD (B), amiloride (C), Cytochalasin D (D).
